# Supplementary material
Source: Elsevier journal article supplement (https://www.sciencedirect.com/science/article/pii/S2173578621000895)
Supplement: mmc1 [file S2173578621000895:mmc1.pdf]

**Table 1.** Effect of Bureaucracy % during everyday practice at Urology Residency in Greece

| Variable                                                     | Median Overall | 10%       | 20%       | 30%       | 40%       | 50%       | 60%       | 70%       | 80%       | 90%      | p-value |
|--------------------------------------------------------------|----------------|-----------|-----------|-----------|-----------|-----------|-----------|-----------|-----------|----------|---------|
| Number of responders                                         | 91             | 1         | 4         | 8         | 14        | 17        | 14        | 18        | 11        | 4        |         |
| What is your confidence level for leading a research project | Very low       | Moderate  | Low       | Very Low  | Very Low  | Very Low  | Very Low  | Very Low  | Very Low  | Very Low | 0.237   |
| What is your confidence level for writing a scientific paper | Very low       | Moderate  | Low       | Low       | Very low  | Very low  | Very low  | Very low  | Very low  | Very low | 0.113   |
| How often do you feel satisfied from your work               | Sometimes      | Sometimes | Sometimes | Sometimes | Sometimes | Rarely    | Sometimes | Rarely    | Rarely    | Rarely   | 0.064   |
| How often do you feel you suffer from burnout                | Sometimes      | Sometimes | Sometimes | Sometimes | Sometimes | Sometimes | Sometimes | Sometimes | Sometimes | Often    | 0.389   |
| Working hours per day                                        | 8-10           | 8-10      | 8-10      | 8-10      | 8-10      | 8-10      | 10-12     | 8-10      | 10-12     | 8-10     | 0.542   |

**Table 2.** Effect of Post-graduate year (PGY) at Urology Residence in Greece

| Variable                                                       | Median Overall | Fellow    | PGY1      | PGY2      | PGY3      | PGY4      | p-value |
|----------------------------------------------------------------|----------------|-----------|-----------|-----------|-----------|-----------|---------|
| Number of responders                                           | 91             | 15        | 21        | 19        | 18        | 18        |         |
| What is your confidence level for leading a research project   | Very low       | Very low  | Very low  | Very low  | Very low  | Very low  | 0.164   |
| What is your confidence level for writing a scientific paper   | Very low       | Very low  | Very low  | Very low  | Very low  | Very low  | 0.127   |
| Number of international publications                           | None           | None      | None      | None      | None      | 1-2       | 0.128   |
| How often do you feel satisfied from your work                 | Sometimes      | Sometimes | Rarely    | Rarely    | Sometimes | Sometimes | 0.560   |
| How satisfied are you from your training in surgery            | 6/10           | 7/10      | 7/10      | 6/10      | 6/10      | 5/10      | 0.573   |
| Number of International Urologic Congresses attended last year | None           | None      | None      | None      | None      | 1-2       | 0.196   |
| How often do you feel you suffer from burnout                  | Sometimes      | Rarely    | Sometimes | Sometimes | Sometimes | Rarely    | 0.275   |
| Weekly hours devoted to urologic literature search/ studying   | 1-5            | 1-5       | 1-5       | 1-5       | 1-5       | 1-5       | 0.450   |

**Table 3.** Effect of Working hours per day at Urology Residency in Greece

| Variable                                                     | Median Overall | 6-8 hours | 8-10 hours | 10-12 hours | >12 hours | p- value      |
|--------------------------------------------------------------|----------------|-----------|------------|-------------|-----------|---------------|
| Number of responders                                         | 91             | 22        | 31         | 26          | 12        |               |
| How often do you feel you suffer from burnout                | Sometimes      | Sometimes | Sometimes  | Sometimes   | Often     | <b>0.028*</b> |
| What is your confidence level for leading a research project | Very low       | Very low  | Very low   | Very low    | Very low  | 0.848         |
| What is your confidence level for writing a scientific paper | Very low       | Very low  | Very low   | Very low    | Very low  | 0.760         |
| Number of international publications                         | None           | None      | None       | 1-2         | None      | 0.153         |
| How often do you feel satisfied from your work               | Sometimes      | Sometimes | Rarely     | Sometimes   | Rarely    | 0.266         |
| How satisfied are you from your training in surgery          | 6/10           | 7/10      | 6/10       | 6/10        | 5/10      | 0.168         |

\* Groups 6-8 vs >12 hours differed significantly (p= 0.016)

**Table 4.** Effect of being Urology Resident at a University clinic in Greece

| Variable                                                              | Median overall | No University clinic | University clinic | p- value         |
|-----------------------------------------------------------------------|----------------|----------------------|-------------------|------------------|
| Number of responders                                                  | 91             | 49                   | 42                |                  |
| Number of residents                                                   | 4-6            | 4-6                  | 7-9               | <b>&lt;0.001</b> |
| Number of weekly educational courses in clinic                        | 1-2 monthly    | 1-2 monthly          | 1-2 monthly       | 0.342            |
| What is your confidence level for leading a research project          | Very low       | Very low             | Very low          | 0.815            |
| What is your confidence level for writing a scientific paper          | Very low       | Very low             | Very low          | 0.612            |
| Number of international publications                                  | None           | None                 | 1-2               | 0.163            |
| Number of International Urologic Congresses attended last year        | None           | None                 | 1-2               | 0.491            |
| Do you use urology apps with your smartphone (nomograms, scores etc.) | -              | 52.3%                | 47.7%             | 0.642            |
| How often do you feel satisfied from your work                        | Sometimes      | Sometimes            | Rarely            | 0.542            |
| Hos satisfied are you from your training in surgery                   | 6/10           | 7/10                 | 6/10              | 0.029            |
| Monthly days off clinic                                               | None           | None                 | None              | 0.227            |
| How often do you feel you suffer from burnout                         | Sometimes      | Sometimes            | Often             | 0.120            |
| Weekly hours devoted to urologic literature search/ studying          | 1-5            | 1-5                  | 1-5               | 0.208            |
| Working hours per day                                                 | 8-10           | 8-10                 | 10-12             | <b>&lt;0.001</b> |

**Table 5.** Effect of being a PhD or MSc candidate at Urology Residency in Greece

| Variable                                                              | Median overall | No PhD or MSc | PhD or MSc | p- value |
|-----------------------------------------------------------------------|----------------|---------------|------------|----------|
| Number of responders                                                  | 91             | 42            | 49         |          |
| What is your confidence level for leading a research project          | Very low       | Very low      | Very low   | 0.591    |
| What is your confidence level for writing a scientific paper          | Very low       | Very low      | Very low   | 0.524    |
| Number of international publications                                  | None           | None          | None       | 0.143    |
| Number of International Urologic Congresses attended last year        | None           | None          | None       | 0.243    |
| Do you use urology apps with your smartphone (nomograms, scores etc.) | -              | 41.5%         | 58.5%      | 0.163    |
| Weekly hours devoted to urologic literature search/ studying          | 1-5            | 1-5           | 1-5        | 0.080    |

**Table 6.** Effect of age group at Urology Residency in Greece

| Variable                                                       | Median overall | 25-30 y/o | 30-35 y/o | 35-40 y/o | ≥ 40 y/o | p- value |
|----------------------------------------------------------------|----------------|-----------|-----------|-----------|----------|----------|
| Number of responders                                           | 91             | 28        | 43        | 14        | 6        |          |
| Number of International Urologic Congresses attended last year | None           | None      | None      | None      | None     | 0.348    |
| Number of international publications                           | None           | None      | None      | None      | None     | 0.482    |
| How often do you feel you suffer from burnout                  | Sometimes      | Rarely    | Sometimes | Sometimes | Often    | 0.198    |

**Table 7.** Effect of number of residents in clinic at Urology Residency in Greece

| Variable                                            | Median overall | 1-3       | 4-6       | 7-9       | ≥ 10      | p- value |
|-----------------------------------------------------|----------------|-----------|-----------|-----------|-----------|----------|
| Number of responders                                | 91             | 21        | 28        | 28        | 14        |          |
| Working hours per day                               | 8-10           | 8-10      | 8-10      | 10-12     | 10-12     | <0.001*  |
| Hos satisfied are you from your training in surgery | 6/10           | 6/10      | 6/10      | 6/10      | 5/10      | 0.668    |
| Monthly days off clinic                             | None           | None      | None      | None      | None      | 0.469    |
| How often do you feel you suffer from burnout       | Sometimes      | Sometimes | Sometimes | Sometimes | Sometimes | 0.368    |

\* All groups differed significantly between them except groups 1-3 vs 4-6, 7-9 vs ≥ 10
